1 **Title: Provider-led community Antiretroviral Therapy distribution in Malawi: Retrospective**  
2 **cohort study of retention, viral load suppression, and costs.**

3 John Songo<sup>1</sup>, Hannah Whitehead<sup>2</sup>, Brooke Nichols<sup>3</sup>, Amos Makwaya<sup>1</sup>, Joseph Njala<sup>1</sup>, Sam  
4 Phiri<sup>1,4</sup>, Risa M. Hoffman<sup>2</sup>, Kathryn Dovel<sup>2</sup> Khumbo Phiri<sup>1</sup>, Joep J. van Oosterhout<sup>1,2</sup>

5 **Affiliations**

6 <sup>1</sup>Partners in Hope, Lilongwe, Malawi;

7 <sup>2</sup>Department of Medicine, Division of Infectious Diseases, David Geffen School of Medicine,  
8 UCLA, Los Angeles, California, USA;

9 <sup>3</sup>FIND, Geneva, Switzerland.

10 <sup>4</sup>Department of Public Health and Family Medicine, Kamuzu University of Health Sciences,  
11 Lilongwe, Malawi

12

13 **Corresponding Author:** John Songo

14 **Email:** pemphosongo@gmail.com

15

16 **Abstract**

17 **Background:** Outcomes of community antiretroviral therapy (ART) distribution (CAD), in which  
18 provider-led ART teams deliver integrated HIV services at health posts in communities, have  
19 been mixed in sub-Saharan African countries. CAD outcomes and costs relative to facility-based  
20 care have not been reported from Malawi.

21 **Methods:** We performed a retrospective cohort study in two Malawian districts (Lilongwe and  
22 Chikwawa districts), comparing CAD with facility-based ART care. We selected an equal number  
23 of clients in CAD and facility-based care who were aged >13 years, had an undetectable viral  
24 load (VL) result in the last year and were stable on first-line ART for  $\geq 1$  year. We compared  
25 retention in care (alive and no period of  $\geq 60$  days without ART) using Kaplan-Meier survival  
26 analysis and Cox regression and maintenance of VL suppression ( $< 1,000$  copies/mL) during  
27 follow-up using logistic regression. We also compared costs (in US\$) from the health system  
28 and client perspectives for the two models of care. Data were collected in October and  
29 November 2020.

30 **Results:** 700 ART clients (350 CAD, 350 facility-based) were included. The median age was 43  
31 years (IQR 36-51), median duration on ART was 7 years (IQR 4-9), and 75% were female.  
32 Retention in care did not differ significantly between clients in CAD (89.4% retained) and  
33 facility-based care (89.3%),  $p=0.95$ . No significant difference in maintenance of VL suppression  
34 were observed between CAD and facility-based care (aOR: 1.24, 95% CI: 0.47-3.20,  $p=0.70$ ).  
35 CAD resulted in slightly higher health system costs than facility-based care: \$118/year vs.  
36 \$108/year per person accessing care; and \$133/year vs. \$122/year per person retained in care.

37 CAD decreased individual client costs compared to facility-based care: \$3.20/year vs.  
38 \$11.40/year per person accessing care; and \$3.60/year vs. \$12.90/year per person retained in  
39 care.

40 **Conclusion:** Clients in provider-led CAD care in Malawi had very good retention in care and VL  
41 suppression outcomes, similar to clients receiving facility-based care. While health system costs  
42 were somewhat higher with CAD, costs for clients were reduced substantially. More research is  
43 needed to understand the impact of other differentiated service delivery models on costs for  
44 the health system and clients.

## 45 **Introduction**

46 Antiretroviral therapy (ART) coverage has expanded greatly in sub-Saharan Africa and Malawi  
47 over the past 20 years (1). The sharply risen number of ART clients has resulted in health  
48 system challenges such as long waiting times, insufficient staffing and limited space (2).  
49 Together with the need for more client-centered and tailored care, such challenges have  
50 inspired innovative ways of delivering care to clients, broadly referred to as differentiated  
51 service delivery (DSD) models (3). Provider-led and community-led Community ART Distribution  
52 (CAD) DSD models have been implemented in Sub-Saharan Africa since 2010 (4). In provider-  
53 led CAD, a team of health care workers (HCWs) travels to small, community-based health posts  
54 to provide comprehensive HIV services, including dispensing ART refills, on scheduled days. In  
55 community-led CAD, ART clients form groups and one community member collects ART refills at  
56 the facility for the whole group (5). Compared to facility-based services, CAD brings HIV care  
57 closer to people's homes, thereby reducing travel time, travel costs and opportunity costs,  
58 which may improve adherence and facilitate retention in care (3,6).

59 Despite widespread implementation of CAD across sub-Saharan Africa, evidence regarding its  
60 effectiveness and cost-effectiveness in improving retention and viral load (VL) suppression is  
61 limited, outcomes have varied and none have been reported from Malawi. An early systematic  
62 review of studies from sub-Saharan Africa suggested that retention in care is higher in provider-  
63 and community-led CAD than in standard facility-based care (6), but two later randomized trials  
64 in Zimbabwe and Lesotho found that retention in care and VL suppression did not differ  
65 significantly between health facility-based care, community-led CAD, and provider-led CAD

66 (7,8). Compared to standard facility-based care, CAD models had higher health system cost per  
67 client retained in care at 12 months in Zambia (9).

68 Comparing retrospective cohort data from clients receiving provider-led CAD and clients  
69 receiving facility-based care, we sought to evaluate the impact of provider-led CAD services on  
70 retention and VL suppression in Malawi. We also assess differences in cost between provider-  
71 led CAD services and facility-based care from a health systems and individual client perspective.

## 72 **Methods**

### 73 ***Study setting***

74 Partners In Hope (PIH) is a Malawian non-governmental organization that provides PEPFAR-  
75 funded support for HIV services in Malawi's National HIV program. PIH implements a provider-  
76 led CAD model for stable (suppressed VL <1,000 copies/mL and on first-line ART) individuals at  
77 4 health facilities in Lilongwe (urban setting, n=2) and Chikwawa (rural setting, n=2) districts,  
78 with a total of 20 CAD outreach sites. Provider-led CAD follows a hub-and-spoke model where a  
79 team of HCWs travels once a month from the hub (a large health facility) to a spoke (a village-  
80 based health post). The team is generally led by a nurse or occasionally a clinical officer, and  
81 includes an HIV diagnostic assistant (HDA), Treatment Supporter, counsellor and driver. Once a  
82 quarter, a data clerk joins the team. Services provided at CAD spokes include ART refills, VL  
83 sample collection, HIV testing services, family planning, screening for non-communicable  
84 diseases, referral to community services and adherence assessment and counselling.

## 85 ***Study design and data collection***

86 We conducted a retrospective cohort study making use of routinely collected data from  
87 standard medical records of 700 ART clients receiving ART care through CAD or health facility-  
88 based services. Data were collected in October-November 2020, from two ‘hub’ health facilities  
89 in Chikwawa and two in Lilongwe, and 20 associated CAD ‘spoke’ sites. We selected all the  
90 clients registered in CAD between January 2019 (when CAD implementation began) and June  
91 2019, and collected data from their first visit through August 2020 to allow for 14 months of  
92 observation time. Clients can choose to be enrolled into provider-led CAD if they meet  
93 programmatic criteria: being stable on first-line ART for more than 12 months, registered at a  
94 hub site, ready to disclose HIV status to other members of the CAD spoke, undetectable result  
95 of the last VL test (within 12 months), and age 13 years or older. We then compiled a list of  
96 individuals receiving standard care at the four hub facilities (“controls”). The inclusion criteria  
97 for controls were the same as for CAD enrolment mentioned above, except for the disclosure  
98 criterion. The number of controls included for each hub was equal to the number of CAD clients  
99 enrolled from that hub facility’s CAD spokes. We selected hub controls chronologically, starting  
100 with those who had visited the facility in January 2019, and proceeding until the required  
101 number of clients was reached.

102 We extracted data on all recorded visits for 14 months after study entry from clients’ individual  
103 ART master-cards. A 14-month period was used to be able to capture full 1-year outcomes,  
104 including defaulting, as defined below. Collected data included: demographic characteristics,  
105 ART initiation date, dates of all CAD/facility visits, results of annual routine VL tests, and  
106 standardized ART outcomes (default, transfer out, stopped ART, death). All data were collected

107 on Android tablets using the SurveyCTO electronic data collection platform. Additional VL test  
108 results were extracted from the National Laboratory Information Systems Management (LIMS)  
109 Database, if missing on ART master-cards. No personal identifiers were collected from the data  
110 sources and therefore all data were anonymized. Ethical approval for the study was obtained  
111 from the National Health Sciences Research Committee in Malawi (#1099).

### 112 ***Key study definitions***

113 *Adverse outcome:* recorded to have died, defaulted or stopped ART during follow-up. For  
114 individuals with multiple adverse outcomes recorded, the earliest outcome was used for all  
115 analyses. For example, if a client had defaulted, then returned to care, and subsequently died,  
116 they were classified as having defaulted.

117 *Defaulted:* per national guidelines, defaulting from care was defined as being overdue for an ART  
118 refill appointment and estimated to have run out of ARVs for 2 months or longer, based on the  
119 quantity of ARVs dispensed at the last visit (10).

120 *Viral load outcomes:* VL results were categorized according to national HIV guidelines: high VL  
121 ( $\geq 1000$  copies/mL); low level viremia (200-999 copies/mL); or suppressed VL (undetectable-199  
122 copies/mL). For logistic regression analyses, we applied a commonly-used binary VL outcome:  
123  $< 1000$  copies/mL and  $\geq 1000$  copies/mL (11). VL results were only included from samples taken  
124 at least 6 months and no more than 18 months after enrollment into CAD or from the first visit  
125 in the study period for controls. We extended the period for VL results from 14 to 18 months due  
126 to the infrequency of VL testing during the study period.

127 **Statistical analysis**

128 Descriptive statistics were generated for client characteristics and outcomes. We compared  
129 viral load outcomes between the two models of care using chi-square tests and logistic  
130 regression. We used Kaplan-Meier survival analysis methods to compare retention in care at  
131 CAD spokes versus hub facilities over the 14 months of follow-up. Each client started  
132 contributing person-time to the analysis from the day that they were enrolled into CAD or  
133 the earliest day that they visited the hub facility between January 2019 and June 2019. Follow-  
134 up time of clients who transferred to another health facility and of those who remained in care  
135 at the end of the follow-up period was censored on their last recorded visit day within the 14  
136 months follow up period. We used Cox regression to produce crude and adjusted hazard ratios  
137 (aHR) of experiencing an adverse outcome, adjusting for sex, age and district.

138 Univariate analysis of the association between key outcome variables and the intervention  
139 were stratified by gender to take into account significant gender differences across the HIV care  
140 cascade in Malawi (12).

141 We assessed the extent of missing data in the sample by key outcome variables and covariates  
142 (retention, VL suppression, sex, age and district). Only VL suppression had missing data (21%)  
143 but the missing data did not vary by arm of intervention (CAD/hub) ( $p= 0.09$ ). All observations  
144 with missing data on VL suppression were excluded from the analysis on VL suppression.

145 All analyses were conducted with Stata v17 (Stata Corp., Texas, USA).

146 **Cost analysis**

147 We calculated the cost per person retained for both facility-based care and CAD care from a  
148 health systems and individual client perspective.



149 Table 1 describes the unit costs collected locally or derived from the literature for both the cost  
 150 to the health system and the cost to the client. For health systems cost per CAD spoke clinic  
 151 day, we include all additional activities required to successfully implement a CAD visit, including  
 152 use of a vehicle to and from the CAD (average of 32km round-trip per CAD visit), and the cost of  
 153 a day of the full clinical team’s services. The total costs were divided by the number of visiting  
 154 clients to each CAD included in the study to determine the cost per individual client CAD visit.

155 **Table 1** Unit costs included in analysis

| Variable                          | Unit cost (USD) 2022 | Sources                            |
|-----------------------------------|----------------------|------------------------------------|
| Provider costs                    |                      |                                    |
| Hub clinic visit                  | \$2.90               | (13)                               |
| CAD spoke visit                   | \$5.95               | Program implementation data (2022) |
| ART day (first-line)              | \$0.21               | (13)                               |
| Viral load                        | \$14.2               | (13)                               |
| Cost to client                    |                      |                                    |
| Wage lost for hub facility visit* | \$2.50               | In-country information             |
| Wages lost for CAD spoke visit**  | \$0.625              | In-country information             |

156 \*1 day of minimum wage lost; \*\*0.25 day of minimum wage lost

## 157 Results

### 158 *Sample characteristics at enrolment*

159 We collected data on 700 ART clients, 350 from provider-led CAD and 350 from facility care  
 160 (Table 2). Approximately 75% of both CAD and hub clients were female. Clients at CAD spokes  
 161 were older (45.3 vs. 42.2 years) and had been on ART for longer (7.2 vs. 6.4 years).

162 **Table 2.** Characteristics of clients at enrollment in CAD spokes and at hub health facilities (controls)

| Variable            | Overall           |      | CAD spokes        |      | Hub facilities    |      |
|---------------------|-------------------|------|-------------------|------|-------------------|------|
|                     | n                 | %    | n                 | %    | n                 | %    |
| Total               | 700               | 100  | 350               | 50.0 | 350               | 50.0 |
| Age                 |                   |      |                   |      |                   |      |
| Median, years (IQR) | 43.8 (36.5- 51.4) |      | 45.3 (38.3- 54.1) |      | 42.2 (34.6- 49.4) |      |
| 13-24 years         | 27                | 3.9  | 10                | 2.8  | 17                | 4.9  |
| 25-34 years         | 111               | 15.9 | 38                | 10.8 | 73                | 20.9 |
| 35-44 years         | 246               | 35.1 | 123               | 35.1 | 123               | 35.1 |
| 45-54 years         | 182               | 26.0 | 97                | 27.7 | 85                | 24.2 |
| 55+ years           | 134               | 19.1 | 82                | 23.4 | 52                | 14.9 |
| Sex                 |                   |      |                   |      |                   |      |
| Male                | 178               | 25.4 | 87                | 24.9 | 91                | 26.0 |
| Female              | 522               | 74.6 | 263               | 75.1 | 259               | 74.0 |
| Duration on ART     |                   |      |                   |      |                   |      |
| Median (IQR)        | 6.8 (4.1- 9.7)    |      | 7.2 (4.2- 9.9)    |      | 6.4 (3.9- 9.3)    |      |
| <4year              | 171               | 24.4 | 81                | 23.1 | 90                | 25.7 |
| 4-8years            | 251               | 35.9 | 119               | 34.0 | 132               | 37.7 |
| >8years             | 278               | 39.7 | 150               | 42.9 | 128               | 36.6 |
| District            |                   |      |                   |      |                   |      |
| Lilongwe            | 228               | 32.6 | 114               | 32.6 | 114               | 32.6 |
| Chikwawa            | 472               | 67.4 | 236               | 67.4 | 236               | 67.4 |

163

164 **Client outcomes**

165 *Descriptive outcomes at 14 months of follow up*

166 At the end of the 14-months of follow-up, approximately 1% of participants had died, 10% had  
 167 defaulted, and 5% had transferred to another health facility. Differences in standard client  
 168 outcomes between CAD and facility-based care were minimal and not statistically significant,  
 169 either overall or when stratified by sex (Table 3).

170 **Table 3** Client outcomes at 14 Months

| Outcome         | Overall |      |     |      |         | Males |      |    |      |         | Females |      |     |      |         |
|-----------------|---------|------|-----|------|---------|-------|------|----|------|---------|---------|------|-----|------|---------|
|                 | n       | %    | n   | %    | p-value | n     | %    | n  | %    | p-value | n       | %    | n   | %    | p-value |
| Died            | 4       | 1.1  | 3   | 0.9  |         | 3     | 3.4  | 2  | 2.2  |         | 1       | 0.4  | 1   | 0.4  |         |
| Stopped ART     | 0       | 0.0  | 0   | 0.0  |         | 0     | 0.0  | 0  | 0.0  |         | 0       | 0.0  | 0   | 0.0  |         |
| Defaulted       | 35      | 10.0 | 34  | 9.7  | 0.619   | 13    | 14.9 | 11 | 12.1 | 0.832   | 22      | 8.4  | 23  | 8.9  | 0.387   |
| Transferred Out | 12      | 3.4  | 19  | 5.4  |         | 4     | 4.6  | 3  | 3.3  |         | 8       | 3.0  | 16  | 6.2  |         |
| Alive on ART    | 299     | 85.4 | 294 | 84.0 |         | 67    | 77.0 | 75 | 82.4 |         | 232     | 88.2 | 219 | 84.6 |         |
| Total           | 350     | 100  | 350 | 100  |         | 87    | 100  | 91 | 100  |         | 263     | 100  | 259 | 100  |         |

171

172 *Kaplan-Meier survival estimates of retention in care at 14 months of follow up.*

173 The average follow-up time was 11.6 months for clients at CAD spokes and 11.1 months at hub  
 174 facilities. The cumulative probability of retention in care over the follow-up period was not  
 175 significantly different between clients in provider-led CAD and facility-based HIV care (88.4% vs.

176 88.3%; p-value 0.95) (Figure 1). Sex was the only covariate with a statistically significant impact  
177 on retention in the total study population (males 80.4% vs. females 90.8%; p =0.005) (Figure 2).

178

179 *Figure 1: Kaplan-Meier survival estimates of retention over 14 months of follow up by model of*  
180 *care*

181 *Figure 2: Kaplan-Meier survival estimates of retention over 14 months of follow up by gender*

182

183 Controlling for sex, age, and district of residence, the risk of experiencing an adverse outcome  
184 was similar for clients in provider-led CAD and facility-based care (aHR: 1.05, 95%CI: 0.66-1.66,  
185 P-value: 0.80)

### 186 ***Viral load outcomes***

187 VL test results were available for 553 clients, representing 79% of the overall sample (82% of  
188 CAD clients; 76% of hub clients; p= 0.09). In univariable analyses, standard VL outcomes were  
189 not significantly different between CAD and health facility-based care, whether overall or  
190 stratified by sex (Table 4). After adjusting for sex, duration on ART, age, and district of  
191 residence, there was no significant difference in prevalence of VL <1,000 copies/ml between  
192 clients in CAD (97%) and in hub care (96%): aOR 1.24, 95% CI 0.47-3.26, p-value 0.66.

193

194

195

196 **Table 4** Viral load suppression

| VL                         | Overall |      |     |      |         | Males |      |     |      |         | Females |      |     |      |         |
|----------------------------|---------|------|-----|------|---------|-------|------|-----|------|---------|---------|------|-----|------|---------|
|                            | CAD     |      | Hub |      | p-value | CAD   |      | Hub |      | p-value | CAD     |      | Hub |      | p-value |
|                            | n       | %    | n   | %    |         | n     | %    | n   | %    |         | n       | %    |     |      |         |
| ≥1000 copies/ml            | 8       | 2.8  | 10  | 3.7  | 0.260   | 2     | 3.0  | 2   | 3.1  | 0.264   | 6       | 2.7  | 8   | 3.9  | 0.552   |
| 200-999 copies/mL          | 57      | 20.0 | 40  | 14.9 |         | 14    | 21.2 | 7   | 10.8 |         | 43      | 19.6 | 33  | 16.3 |         |
| undetectable-199 copies/mL | 220     | 77.2 | 218 | 81.3 |         | 50    | 75.8 | 56  | 86.2 |         | 170     | 77.6 | 162 | 79.8 |         |
| Total                      | 285     | 100  | 268 | 100  |         | 66    | 100  | 65  | 100  |         | 219     | 100  | 203 | 100  |         |

197

198 **Costs**

199 Table 5 describes the resources used per client for both CAD-based and facility-based care.

200 Differences in resource use, considering the standard deviations, were small between the

201 models of care.

202 **Table 5** Resource utilization of CAD-based care and facility-based care in Malawi (average and standard

203 deviation)

| Variable                   | CAD-based care | Facility-based care |
|----------------------------|----------------|---------------------|
| Number of clinic visits    | 0              | 4.6 (SD 1.4)        |
| Number of CAD visits       | 5.1 (SD 1.5)   | 0                   |
| Number of ART days         | 351 (SD 92)    | 383 (SD 91)         |
| Number of viral load tests | 0.9 (SD 0.7)   | 1.0 (SD 0.6)        |

204

205 The total costs per person receiving care and the costs per person retained by model of care,

206 from a health systems and individual client perspective, are described in Table 6. Health system

207 cost estimates for provider-led CAD were \$118 per person receiving care per year and \$108 per

208 person per year in facility-based care. Cost for individual clients was lower in provider-led CAD

209 (\$3.17 per person per year) than facility-based care (\$11.44 per person per year). In a second  
210 analysis limited to those retained in care, the gap in health systems costs between the two  
211 models of care was the same (\$10 lower in provider-led CAD), while differences in costs for  
212 clients widened slightly (from \$8.27 reduced cost per client to \$9.30 reduced cost for client  
213 retained in provider-led CAD).

214 *Table 2. Cost per person in care and cost per person retained comparing facility- and provider-led CAD-*  
215 *(based on 2022 USD)*

| Variable                 | CAD                | Facility-based care |
|--------------------------|--------------------|---------------------|
| Health system cost       |                    |                     |
| Cost per client          | \$118 (SD \$29)    | \$108 (SD \$24)     |
| Cost per client retained | 133                | 122                 |
| Client cost              |                    |                     |
| Cost per client          | \$3.17 (SD \$0.96) | \$11.44 (SD \$3.53) |
| Cost per client retained | 3.58               | 12.88               |

216

## 217 Discussion

218 In a retrospective assessment of two models of HIV care in Malawi, we found that retention in  
219 care and viral suppression outcomes were similar in provider-led CAD as compared to facility-  
220 based care. While health system cost per person provided care and per person retained in care  
221 were 9% higher in provider-led CAD, cost for 12-months of HIV care incurred by clients was 72%  
222 lower in CAD than in facility-based care.

223 Prior studies of CAD in sub-Saharan Africa had mixed findings. In two similar cluster randomized  
224 trials, one in Lesotho and one in Zimbabwe, no significant differences in retention in care and  
225 VL suppression were observed between facility-based 3-monthly ART (control), 3-monthly  
226 community ART groups, and 6-monthly provided-led CAD (7,8). In contrast, in a retrospective

227 cohort study from Mozambique, retention in care was significantly higher among clients in  
228 community-led CAD (at 99.1% at 12 months) than in facility-based care (89.5%,  $p < 0.0001$ ) (14).  
229 In the same setting, another retrospective cohort study found that individuals in facility-based  
230 care were more than twice as likely to be lost to follow up (HR 2.356;  $p = 0.04$ ) than matched  
231 participants in community-led CAD (5). Differences in the organization of CAD services,  
232 variations in the local setting (including rural vs. urban) and the degree of donor support may  
233 explain these variations in ART outcomes. It has been suggested that in community-led CADs,  
234 clients acquire ownership of their ART care, as group representatives take turns to collect ART  
235 at the facility for the whole group and members actively trace group members who miss a  
236 group ART distribution session (14). Such activities may increase group members' ability to self-  
237 manage their own care (15) and lead to better retention and VL suppression. To date, CADs are  
238 largely only available to stable ART clients and this presents potential missed opportunities to  
239 engage non-stable clients in CAD.

240 From a health systems perspective, provider-led CAD is slightly more expensive than facility-  
241 based care. The difference was relatively small (9% higher, or approximately \$10 more per  
242 person receiving care per year). Additional costs are due to HCWs traveling to CAD locations,  
243 but the vast majority of ART costs are generated by medication and VL testing, which do not  
244 vary by provider-led CAD or facility-based care. However, we found that provider-led CAD  
245 substantially reduced costs for clients by nearly three-quarters, mainly due to lower  
246 opportunity costs as clients need less travel time to access ART services. Health system costs of  
247 provider-led CAD can be reduced by decreasing the frequency of the team's travels to  
248 distribution sites, in combination with expansion of multi-month dispensing. This may also

249 further reduce clients' costs and could benefit retention and viral suppression outcomes (16).  
250 Our results are consistent with findings from the only other study from the region that assessed  
251 costs and outcomes across community-based ART models. In this study from Zambia, costs for  
252 CAD models ranged from an annual \$116/person to \$199/person compared with \$100/person  
253 for facility-care (9).

254 A limitation of our cost analysis is that we did not incorporate travel costs for clients (cost of  
255 transportation to/from facility-based care) as many clients walk, use their own bicycle or make  
256 informal arrangements that are not directly tied to financial cost. It is therefore highly likely  
257 that we underestimated the difference in clients' costs and provider-led CAD may have a  
258 greater financial benefit to clients than reported here. This is supported by a qualitative study  
259 on client and nurse perspectives of provider-led community-based models of HIV care in  
260 Malawi, where clients reported that CAD services resulted in savings on transportation costs  
261 and the time it took them to travel to a health facility (17).

262 As is common with observational studies, our results may be prone to bias as clients enrolled in  
263 CAD are selected based on specific characteristics, such as being clinically stable, which cannot  
264 be completely adjusted for in statistical analyses. However, great effort was put into ensuring  
265 that the eligibility criteria used for enrolment into CAD is adhered to during selection of  
266 controls through a strict study enrolment protocol that was double checked at data collection  
267 and at analysis.

## 268 **Conclusions**

269 Provider-led CAD services in Malawi had excellent one-year retention and VL suppression  
270 results that were similar to facility-based care. CAD was associated with a small increase in the



271 financial costs to the health system but substantial savings for clients, which may benefit longer  
272 term engagement in care and ART outcomes. More study is need to determine cost-  
273 effectiveness of different DSD models in sub-Saharan Africa.

274 ***Acknowledgements.***

275 We are grateful for funding by PEPFAR through USAID that allowed Partners in Hope to  
276 implement the provider-led CAD program and to collect the data for this analysis. We also  
277 thank the support of the participating health facilities and their management teams.

## 278 References

- 279 1. Geneva: Joint United Nations Programme on HIV/AIDS. UNAIDS data 2021 [Internet].  
280 2021. Available from:  
281 [https://www.unaids.org/sites/default/files/media\\_asset/JC3032\\_AIDS\\_Data\\_book\\_2021\\_En.pdf](https://www.unaids.org/sites/default/files/media_asset/JC3032_AIDS_Data_book_2021_En.pdf)  
282
- 283 2. Kalua T, Tippet Barr BA, van Oosterhout JJ, Mbori-Ngacha D, Schouten EJ, Gupta S, et al.  
284 Lessons Learned From Option B+ in the Evolution Toward “Test and Start” From Malawi,  
285 Cameroon, and the United Republic of Tanzania. *JAIDS J Acquir Immune Defic Syndr*  
286 [Internet]. 2017 May 1;75(1):S43–50. Available from:  
287 <http://insights.ovid.com/crossref?an=00126334-201705011-00007%0Ahttp://www.ncbi.nlm.nih.gov/pubmed/28398996>  
288
- 289 3. Davis N, Kanagat N, Sharer M, Eagan S, Pearson J, Amanyeiwe UU. Review of  
290 differentiated approaches to antiretroviral therapy distribution. *AIDS Care - Psychol*  
291 *Socio-Medical Asp AIDS/HIV* [Internet]. 2018;30(8):1010–6. Available from:  
292 <https://doi.org/10.1080/09540121.2018.1441970>
- 293 4. Vogt F, Kalenga L, Lukela J, Salumu F, Diallo I, Nico E, et al. Brief Report: Decentralizing  
294 ART Supply for Stable HIV Patients to Community-Based Distribution Centers: Program  
295 Outcomes From an Urban Context in Kinshasa, DRC. *JAIDS J Acquir Immune Defic Syndr*  
296 [Internet]. 2017 Mar 1;74(3):326–31. Available from:  
297 <https://journals.lww.com/00126334-201703010-00014>
- 298 5. Jobarteh K, Shiraishi RW, Malimane I, Gudo PS, Decroo T, Auld AF, et al. Community ART  
299 support groups in Mozambique: The potential of patients as partners in care. *PLoS One*.  
300 2016;11(12):1–14.
- 301 6. Decroo T, Rasschaert F, Telfer B, Remartinez D, Laga M, Ford N. Community-based  
302 antiretroviral therapy programs can overcome barriers to retention of patients and  
303 decongest health services in sub-Saharan Africa: a systematic review. *Int Health*  
304 [Internet]. 2013 Sep 1;5(3):169–79. Available from:  
305 <https://academic.oup.com/inthealth/article-lookup/doi/10.1093/inthealth/iht016>
- 306 7. Fatti G, Ngorima-Mabhena N, Mothibi E, Muzenda T, Choto R, Kasu T, et al. Outcomes of  
307 Three- Versus Six-Monthly Dispensing of Antiretroviral Treatment (ART) for Stable HIV  
308 Patients in Community ART Refill Groups: A Cluster-Randomized Trial in Zimbabwe. *J*  
309 *Acquir Immune Defic Syndr*. 2020;84(2):162–72.
- 310 8. Tukei BB, Fatti G, Tiam A, Ngorima-Mabhena N, Tukei VJ, Tshabalala I, et al. Twelve-  
311 Month Outcomes of Community-Based Differentiated Models of Multimonth Dispensing  
312 of ART Among Stable HIV-Infected Adults in Lesotho: A Cluster-Randomized  
313 Noninferiority Trial. *J Acquir Immune Defic Syndr*. 2020;85(3):280–91.
- 314 9. Nichols BE, Cele R, Jamieson L, Long LC, Siwale Z, Banda P, et al. Community-based  
315 delivery of HIV treatment in Zambia: costs and outcomes. *AIDS*. 2021;35(2):299–306.

- 316 10. Malawi Ministry of Health. Clinical Management of HIV in Children and Adults. Lilongwe;  
317 2018.
- 318 11. World Health Organization. Consolidated guidelines on HIV prevention, testing,  
319 treatment, service delivery and monitoring: recommendations for a public health  
320 approach. Geneva; 2021.
- 321 12. United Nations Programme on HIV/aids. UNAIDS. UNAIDS data 2021 [Internet]. 2021.  
322 Available from:  
323 [https://www.unaids.org/en/resources/documents/2021/2021\\_unaids\\_data](https://www.unaids.org/en/resources/documents/2021/2021_unaids_data)
- 324 13. Nichols BE, Oforjebe OA, Cele R, Shaba F, Balakasi K, Chivwara M, et al. Economic  
325 evaluation of facility-based HIV self-testing among adult outpatients in Malawi. *J Int AIDS*  
326 *Soc* [Internet]. 2020 Sep 9;23(9):e25612. Available from:  
327 <https://onlinelibrary.wiley.com/doi/10.1002/jia2.25612>
- 328 14. Decroo T, Telfer B, Dores C Das, White RA, Santos N Dos, Mkwamba A, et al. Effect of  
329 Community ART Groups on retention-in-care among patients on ART in Tete Province,  
330 Mozambique: A cohort study. *BMJ Open*. 2017;7(8):1–9.
- 331 15. Dudhia R, Kagee A. Experiences of participating in an antiretroviral treatment adherence  
332 club. *Psychol Health Med* [Internet]. 2015 May 19;20(4):488–94. Available from:  
333 <http://www.tandfonline.com/doi/full/10.1080/13548506.2014.953962>
- 334 16. Rasschaert F, Telfer B, Lessitala F, Decroo T, Remartinez D, Biot M, et al. A qualitative  
335 assessment of a community antiretroviral therapy group model in Tete, Mozambique.  
336 *PLoS One*. 2014;9(3):1–11.
- 337 17. Sande O, Burtscher D, Kathumba D, Tweya H, Phiri S, Gugsa S. Patient and nurse  
338 perspectives of a nurse-led community-based model of HIV care delivery in Malawi: A  
339 qualitative study. *BMC Public Health*. 2020;20(1):1–8.
- 340

# Kaplan-Meier survival estimates by CAD/Hub

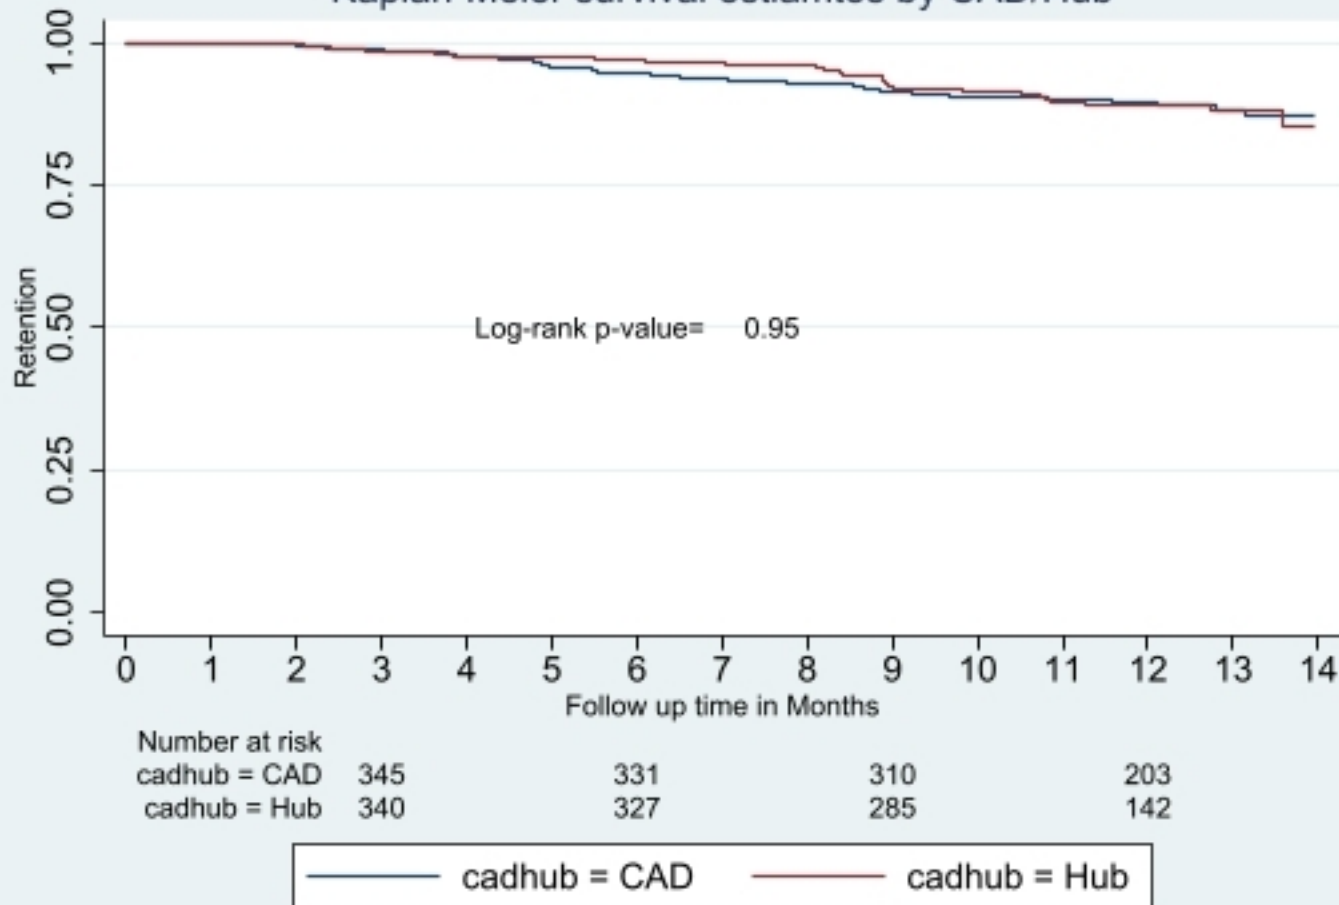

Figure 1

Kaplan-Meier survival estimates by gender

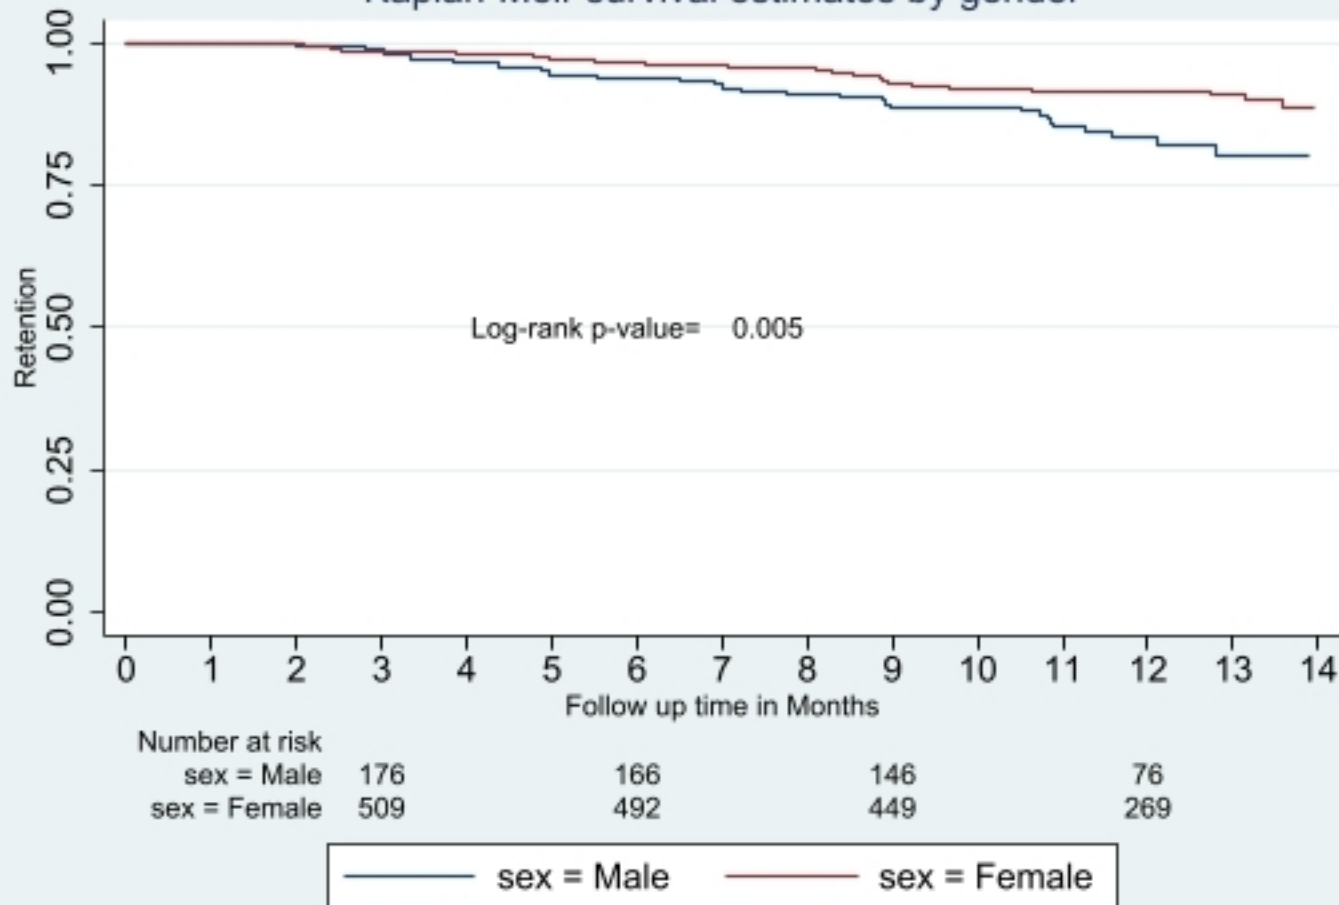

Figure 2
